# Supplementary material for: High-aspect-ratio water-dispersed gold nanowires incorporated within gelatin methacrylate hydrogels for constructing cardiac tissuesin vitro
Source: Royal Society of Chemistry journal article supplement (doi:10.1039/d0tb00768d), 2020-01-01
Supplement: d0tb00768d5.pdf [file d0tb00768d5.pdf]

**High-aspect-ratio water-dispersed gold nanowires incorporated  
within gelatin methacrylate hydrogel for constructing cardiac tissues  
*in vitro*<sup>†</sup>**

Xiao-Pei Li,<sup>a</sup> Kai-Yun Qu,<sup>a</sup> Feng Zhang,<sup>a</sup> Han-Ning Jiang,<sup>a</sup> Ning Zhang,<sup>a</sup> Nihad Cheraga,<sup>a</sup> Chao-Ming Liu,<sup>a</sup> Kai-Hong Wu,<sup>b</sup> Xiao-Wei Wang,<sup>c</sup> Ning-Ping Huang<sup>\*a</sup>

<sup>a</sup>State Key Laboratory of Bioelectronics, School of Biological Science and Medical Engineering, Southeast University, Nanjing 210096, China.

E-mail: nphuang@seu.edu.cn; Fax: +86-25-83795635; Tel: +86-25-83790820

<sup>b</sup>Cardiovascular Center, Children's Hospital of Nanjing Medical University, Nanjing, Nanjing 210008, P.R.China.

<sup>c</sup>Department of Cardiovascular Surgery, The First Affiliated Hospital of Nanjing Medical University, Nanjing 210029, P.R.China.

## Supporting Information

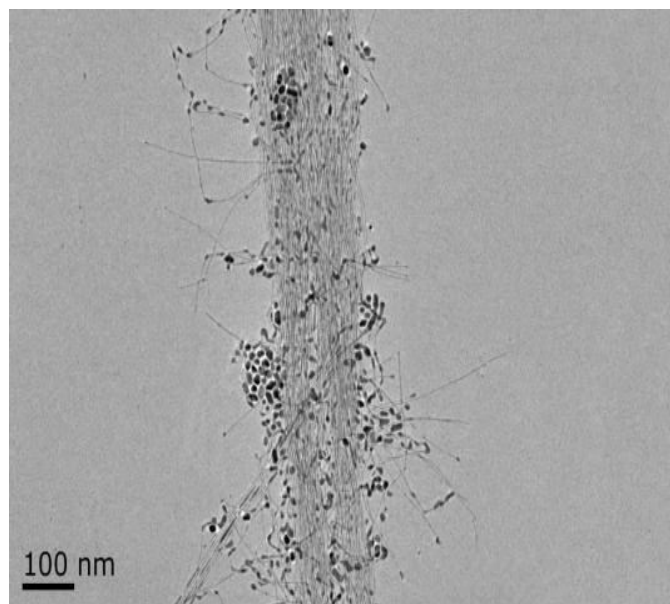

**Figure S1.** The TEM image of oil-dispersed AuNWs.

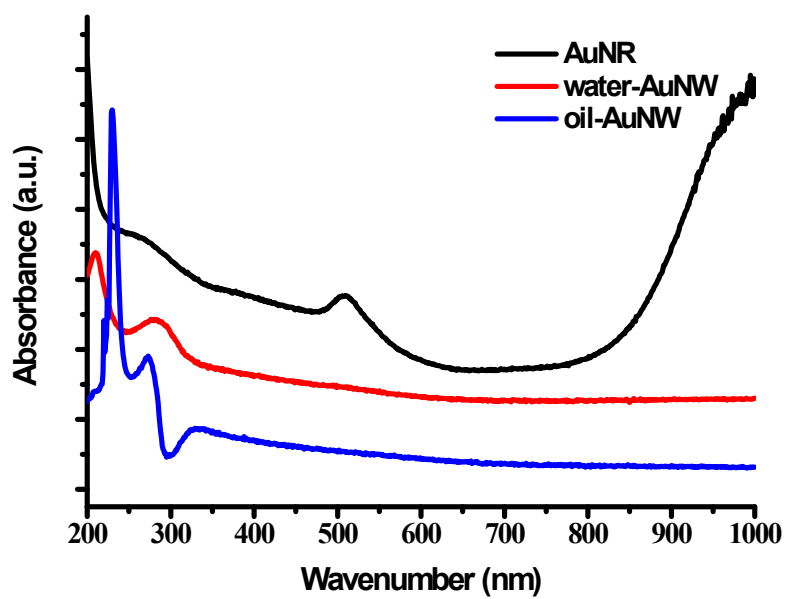

**Figure S2.** The UV-Vis spectrum of water-dispersed AuNRs, and AuNWs dispersed in oil phase and water phase.

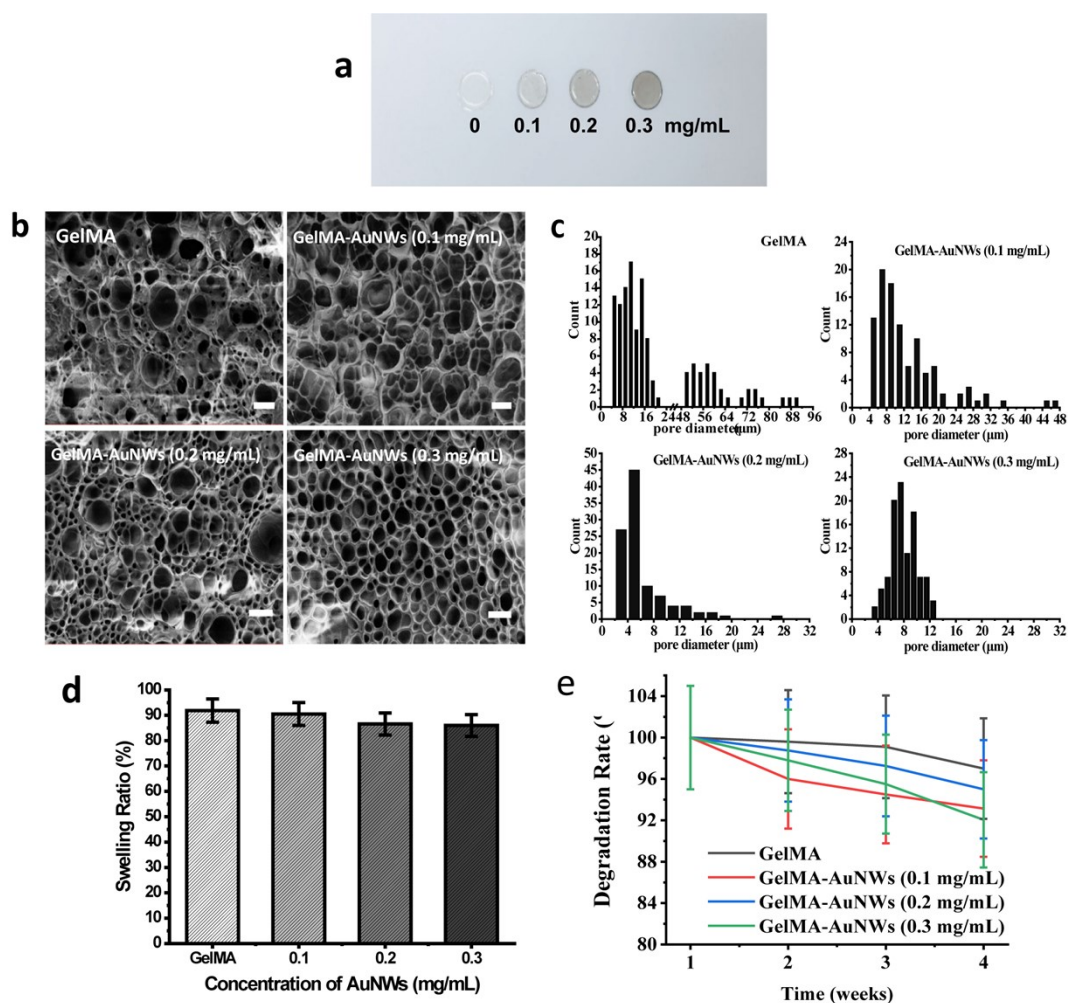

**Figure S3.** Physical characterization of GelMA and GelMA-AuNWs hybrid hydrogels. (a) Optical image of GelMA and GelMA-AuNWs hybrid hydrogels containing 0.1, 0.2, and 0.3 mg/mL AuNWs. Scale bar: 1 cm. (b) SEM images of GelMA and GelMA-AuNWs hybrid hydrogels. Scale bars: 50  $\mu$ m. (c) Statistical diagram of aperture size distribution of GelMA-AuNWs hybrid hydrogels. (d) Swelling ratio of GelMA-AuNWs hybrid hydrogels at different AuNWs concentrations, demonstrating lower swelling with increase in AuNWs concentration. (e) Degradation properties of GelMA-AuNWs hybrid hydrogels. \* $p < 0.05$ .

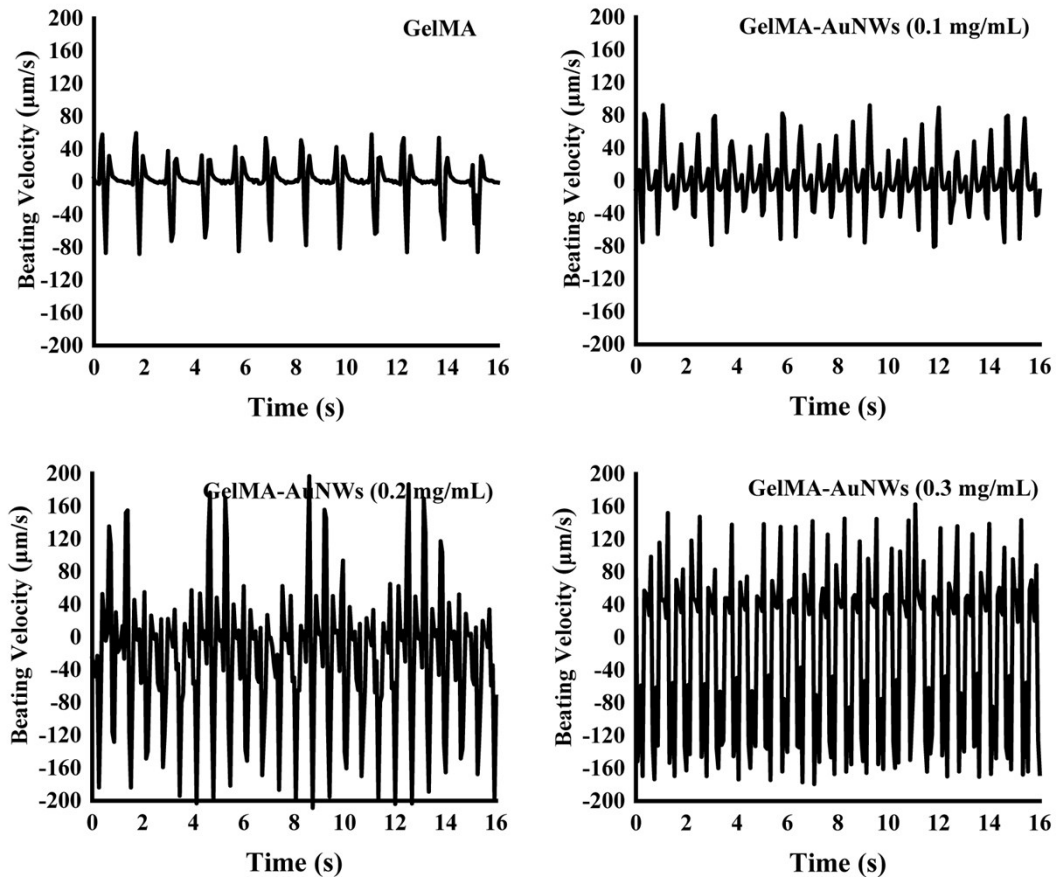

**Figure S4.** Representative beating signal graphs from cardiomyocytes on GelMA and GelMA-AuNWs hybrid hydrogels containing 0.1, 0.2, and 0.3 mg/mL AuNWs on day 7 of culture.

#### **Supplementary movies:**

Movie S1: Representative video of cardiomyocytes beating on GelMA and GelMA-AuNWs hybrid hydrogels containing 0.1, 0.2, and 0.3 mg/mL AuNWs on day 3 of culture.

Movie S2: Representative video of cardiomyocytes beating on GelMA and GelMA-AuNWs hybrid hydrogels containing 0.1, 0.2, and 0.3 mg/mL AuNWs on day 5 of culture.

Movie S3: Representative video of cardiomyocytes beating on GelMA and GelMA-AuNWs hybrid hydrogels containing 0.1, 0.2, and 0.3 mg/mL AuNWs on day 7 of culture.

Movie S4: Representative video illustrating spontaneous  $\text{Ca}^{2+}$  dynamics of cardiomyocytes on GelMA and GelMA-AuNWs hybrid hydrogels containing 0.3 mg/mL AuNWs on day 3 of culture.
